# Supplementary figures and images for: Transient intracellular acidification regulates the core transcriptional heat shock response
Source: eLife journal article supplement (doi:10.7554/elife.54880), 2020-08-07

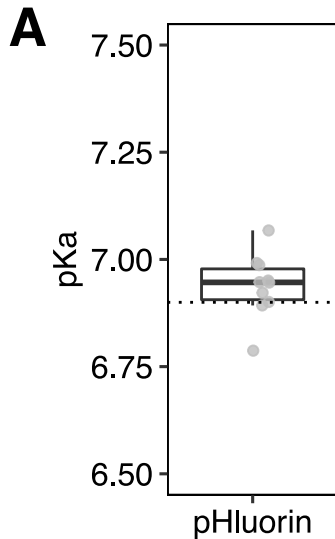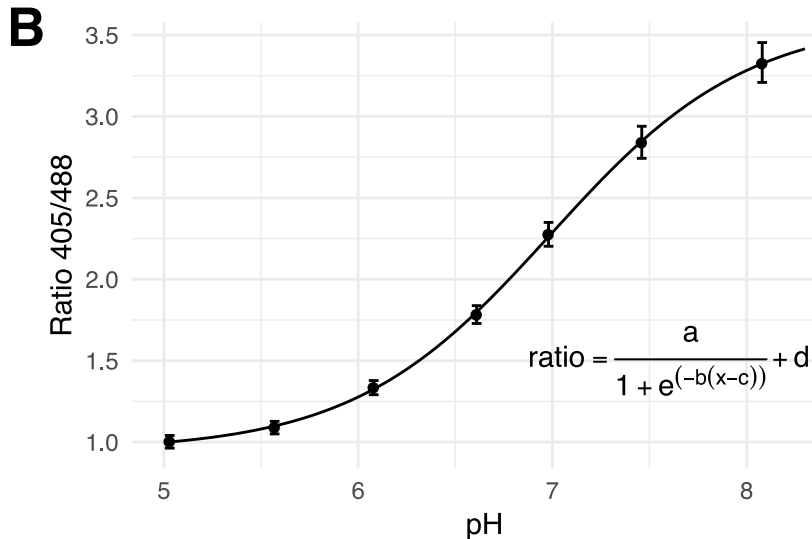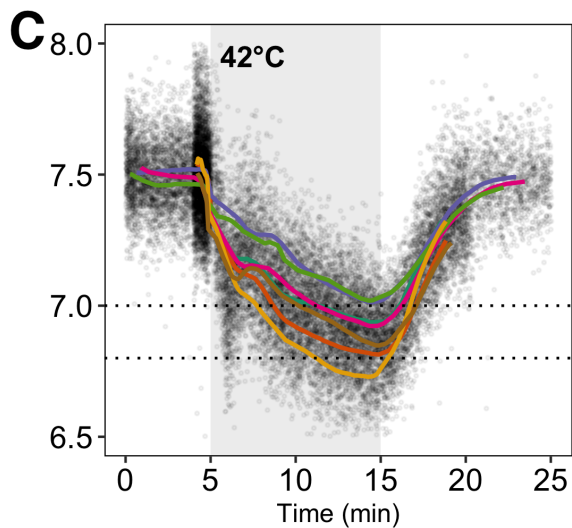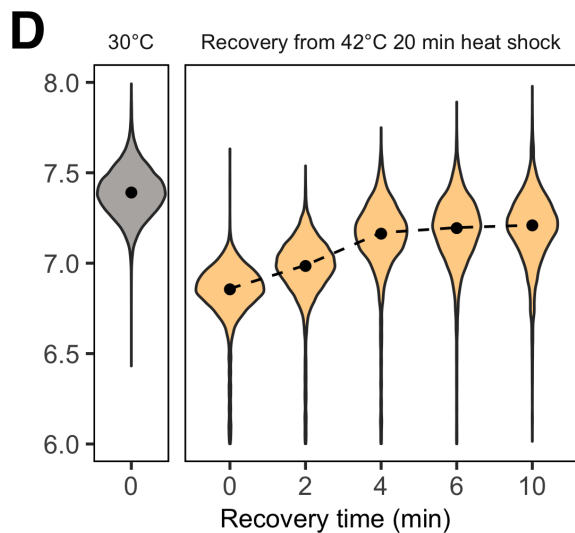

Supplement: supp [file elife_poa_e54880_Figure_1_figure_supplement_1.pdf › elife_poa_e54880_Figure_1_figure_supplement_1.pdf]

**A**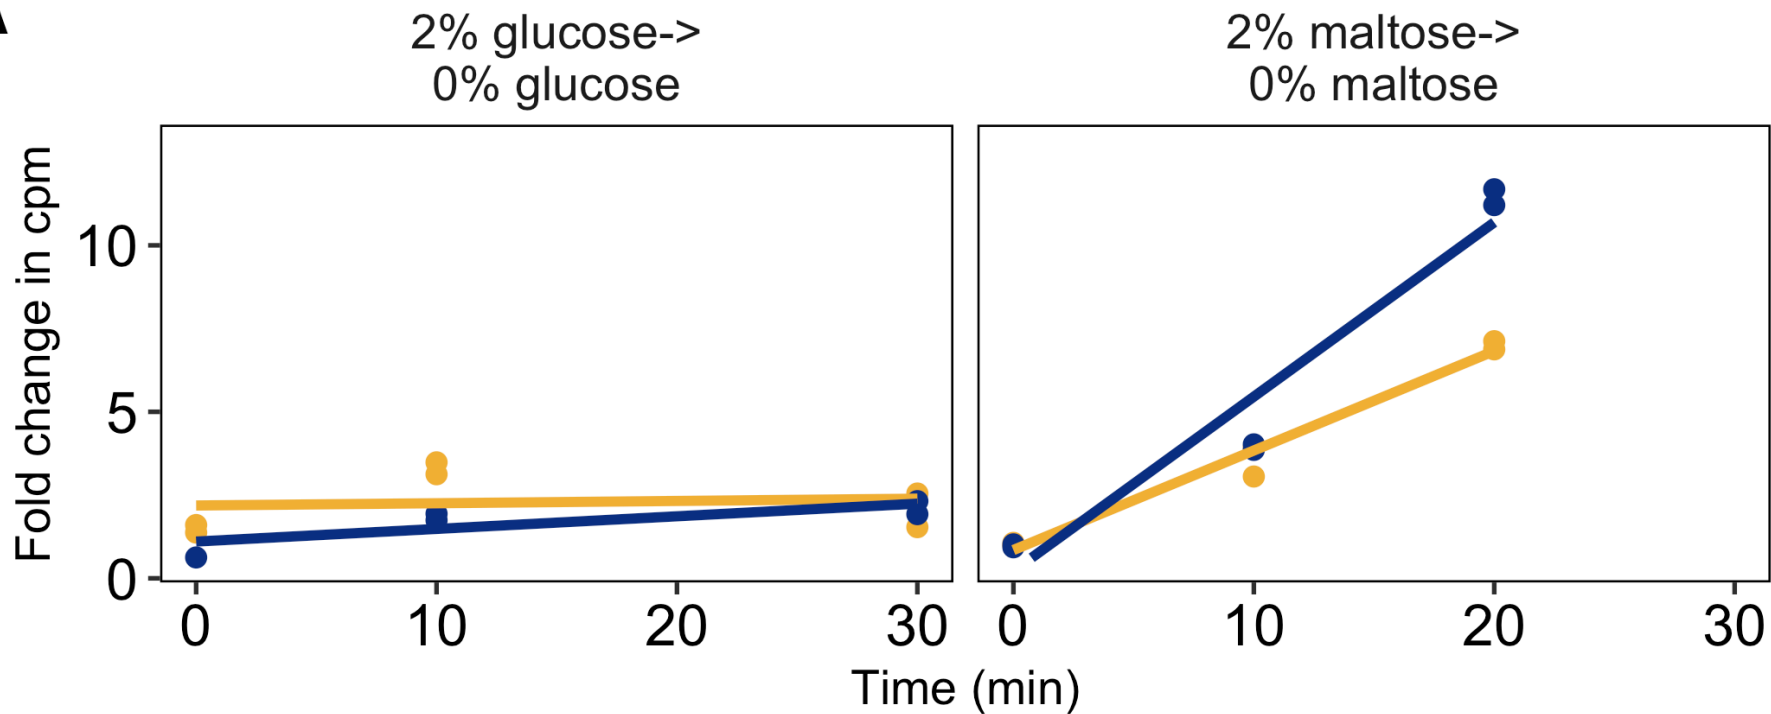**B**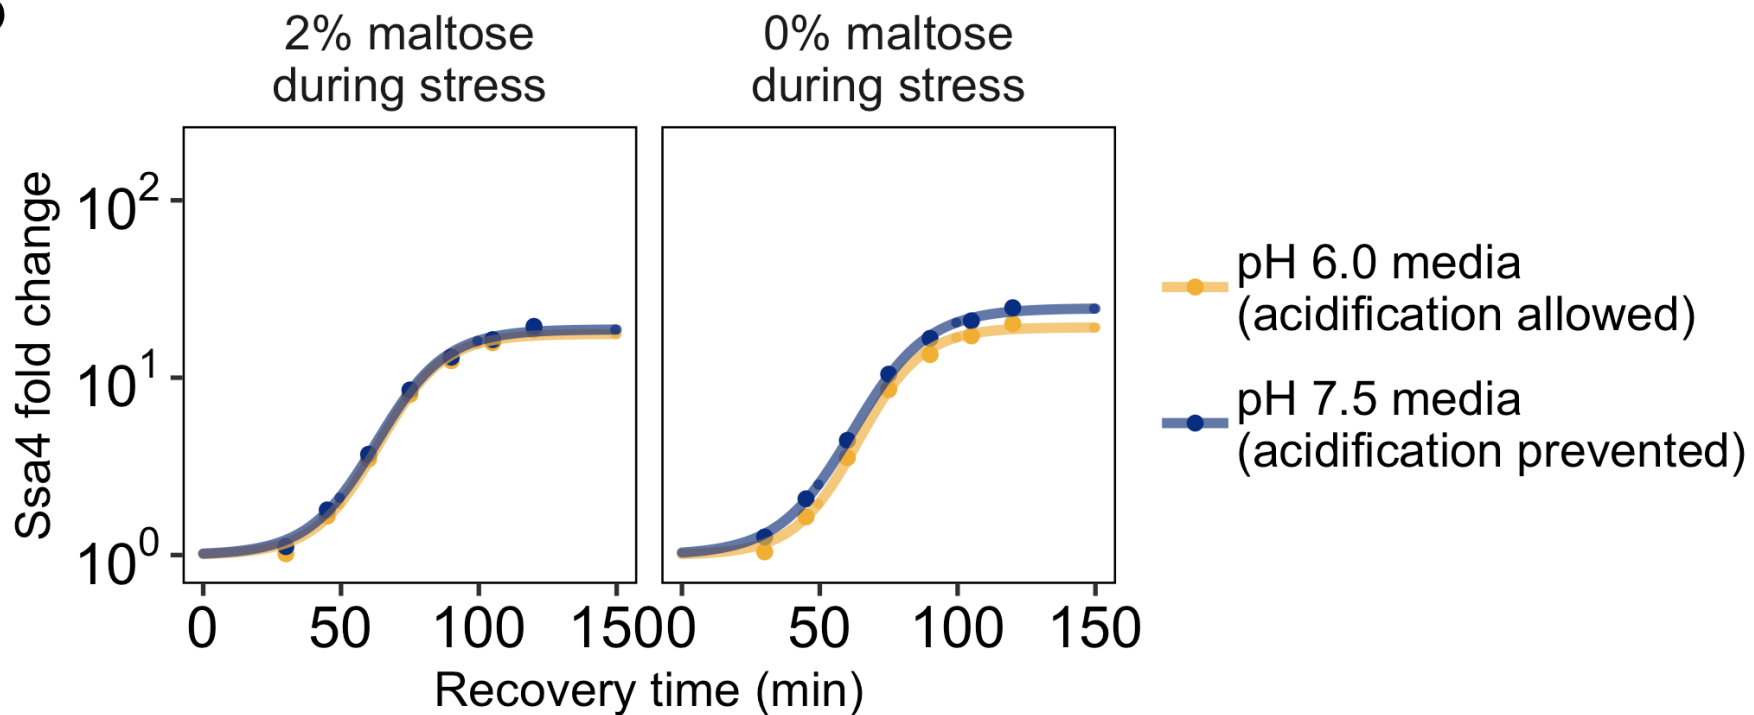

Supplement: supp [file elife_poa_e54880_Figure_2_figure_supplement_1.pdf › elife_poa_e54880_Figure_2_figure_supplement_1.pdf]

**A**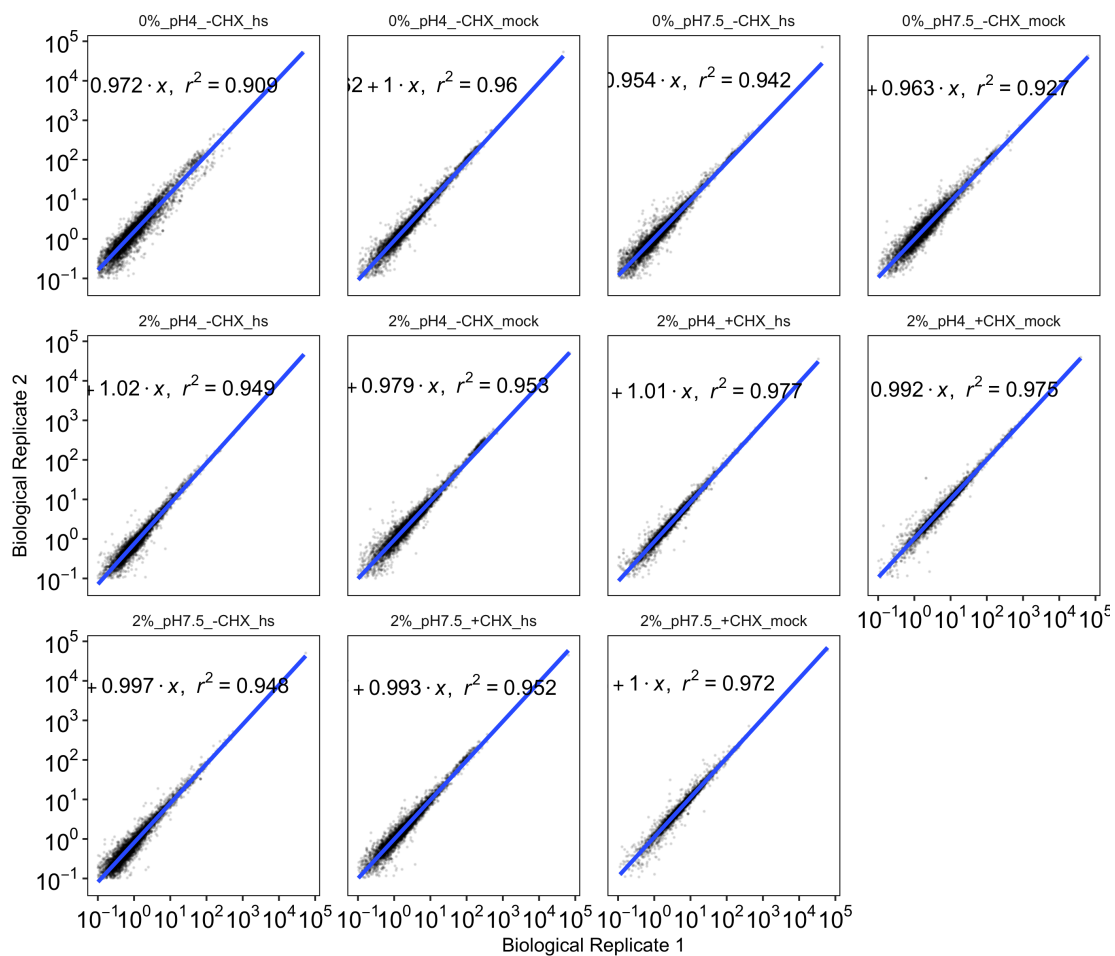**B**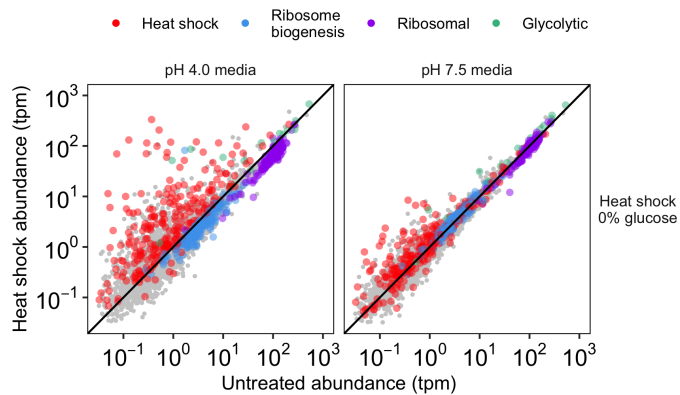

Supplement: supp [file elife_poa_e54880_Figure_3_figure_supplement_1.pdf › elife_poa_e54880_Figure_3_figure_supplement_1.pdf]

**A**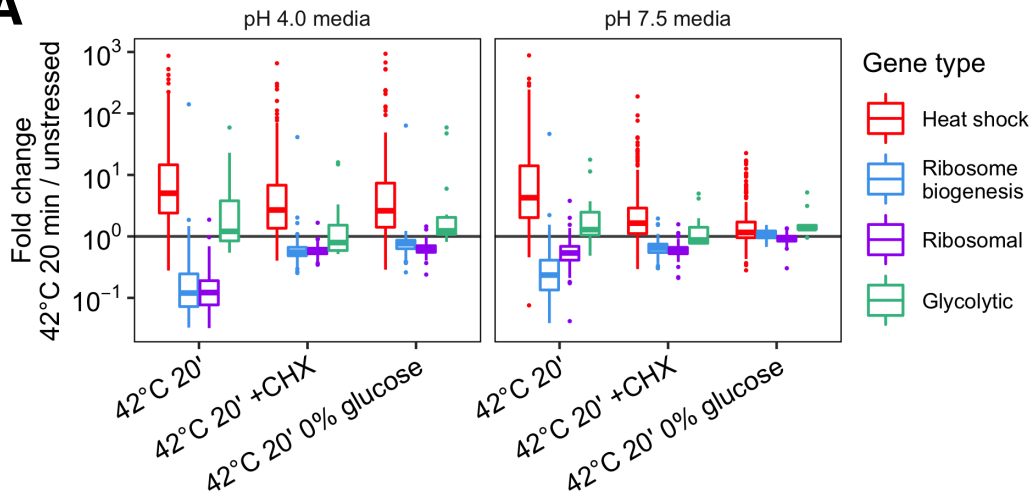**B**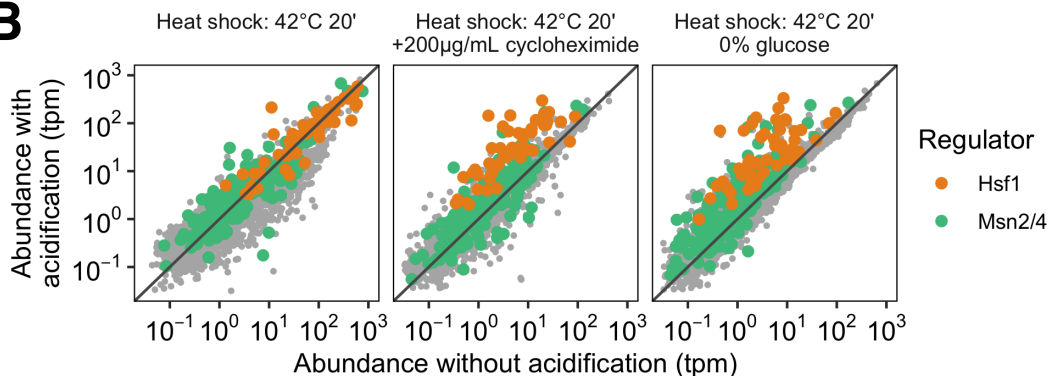**C**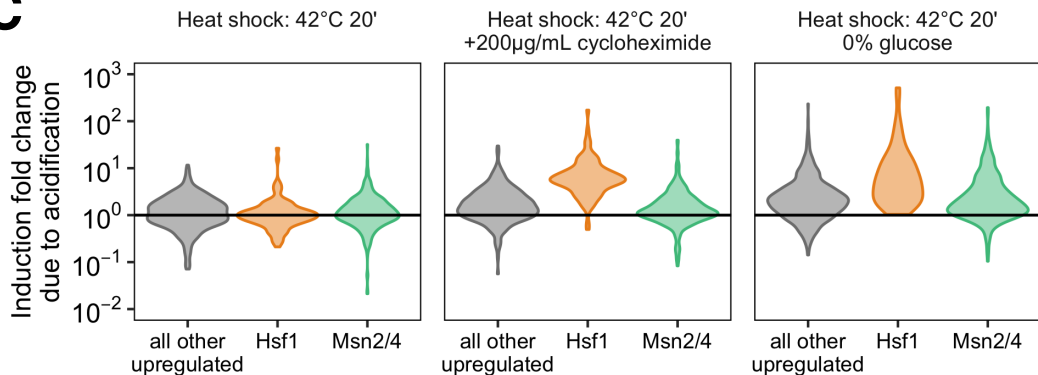

Supplement: supp [file elife_poa_e54880_Figure_3_figure_supplement_2.pdf › elife_poa_e54880_Figure_3_figure_supplement_2.pdf]

**A**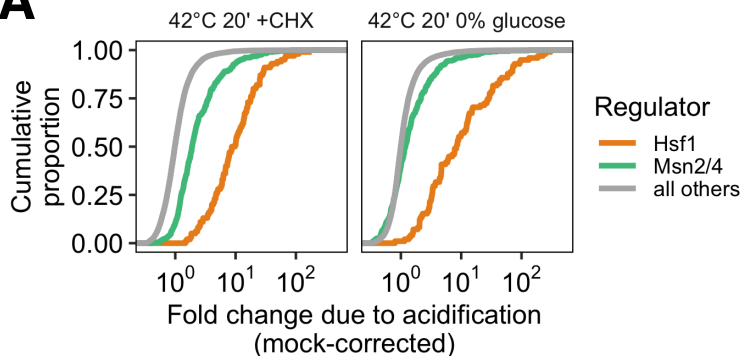**B**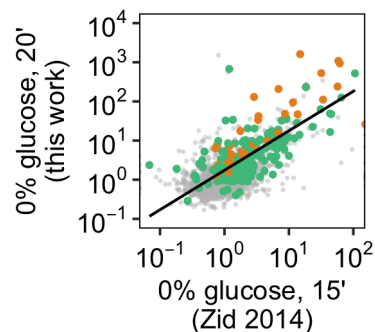**C**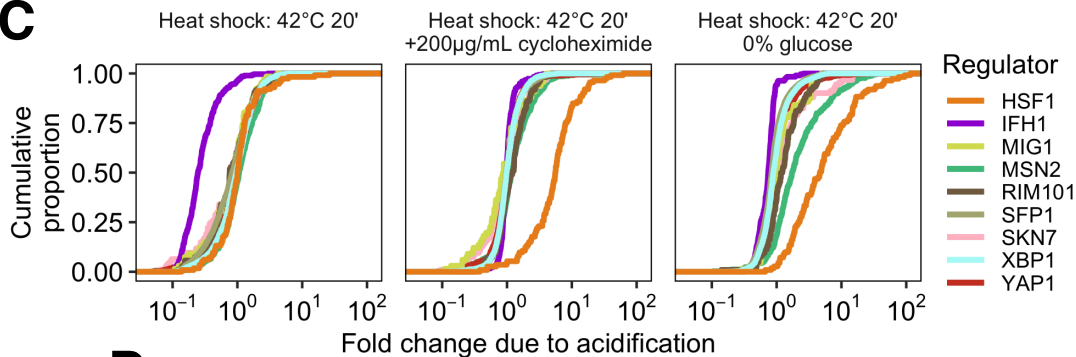**D**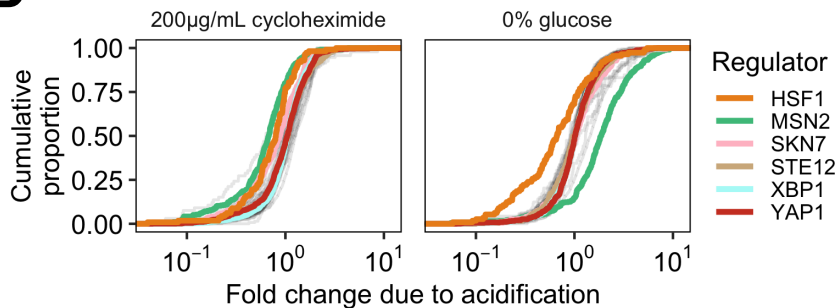

Supplement: supp [file elife_poa_e54880_Figure_3_figure_supplement_3.pdf › elife_poa_e54880_Figure_3_figure_supplement_3.pdf]

**A**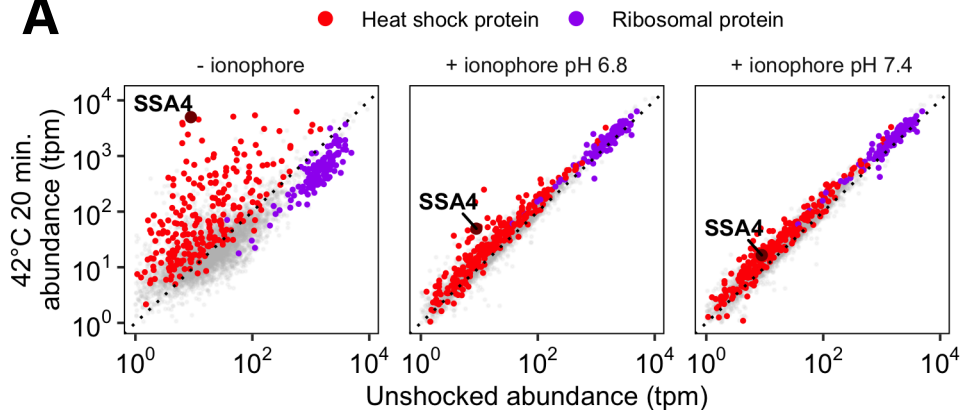**B**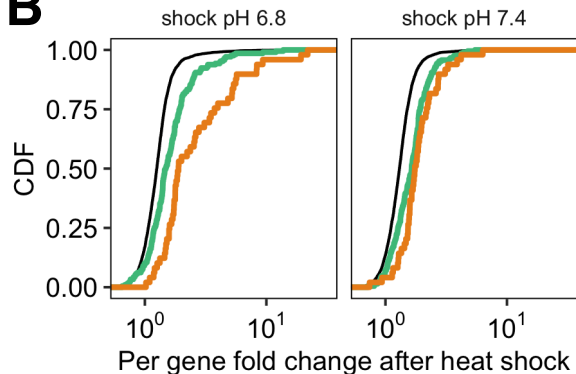**C**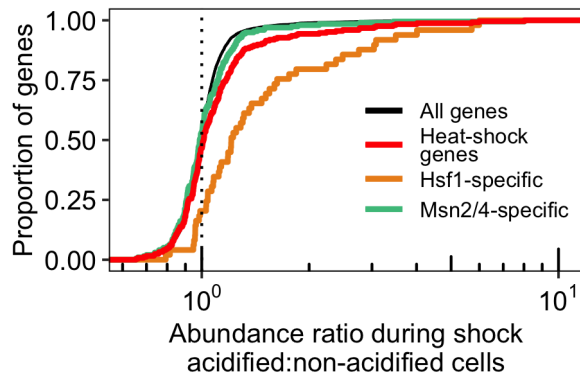

Supplement: supp [file elife_poa_e54880_Figure_3_figure_supplement_4.pdf › elife_poa_e54880_Figure_3_figure_supplement_4.pdf]

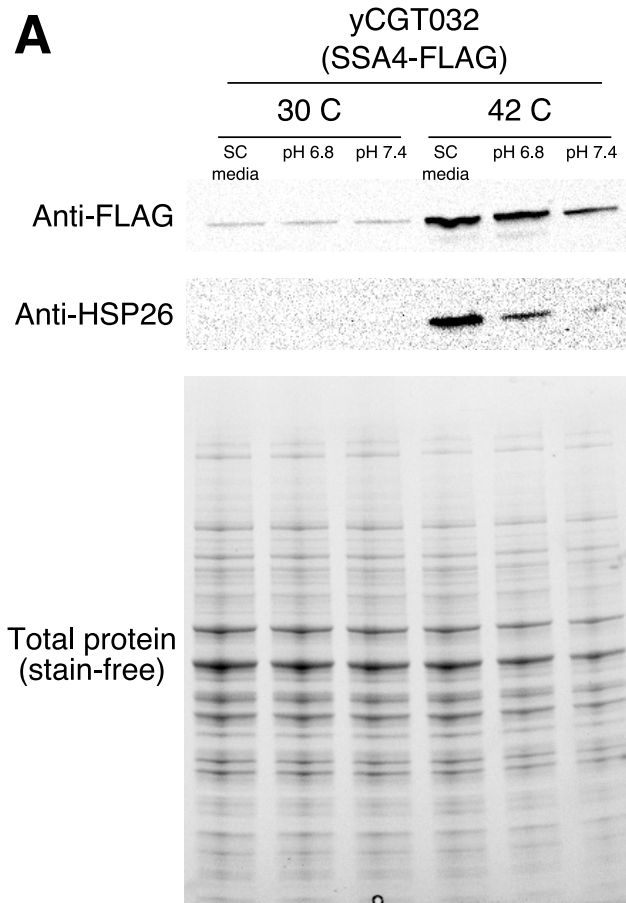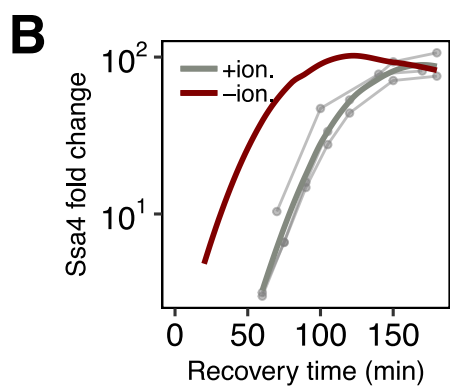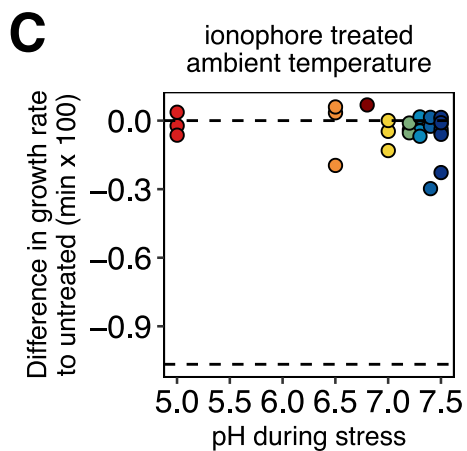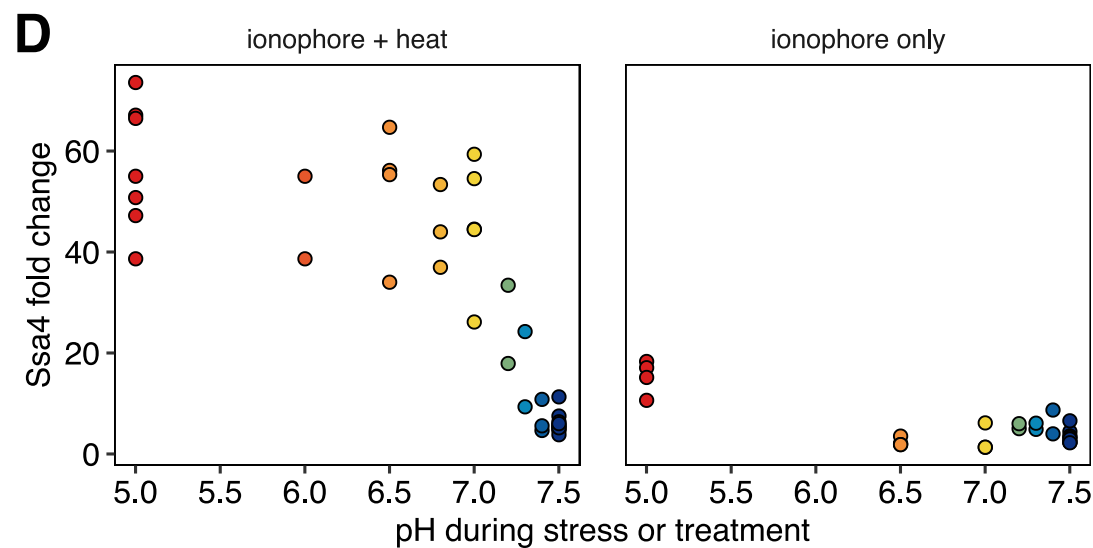

Supplement: supp [file elife_poa_e54880_Figure_4_figure_supplement_1.pdf › elife_poa_e54880_Figure_4_figure_supplement_1.pdf]

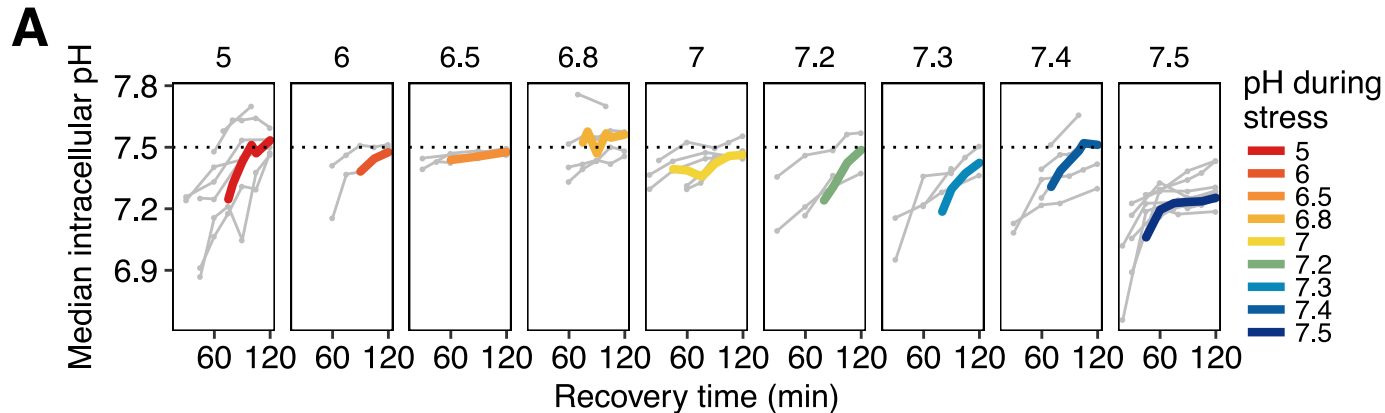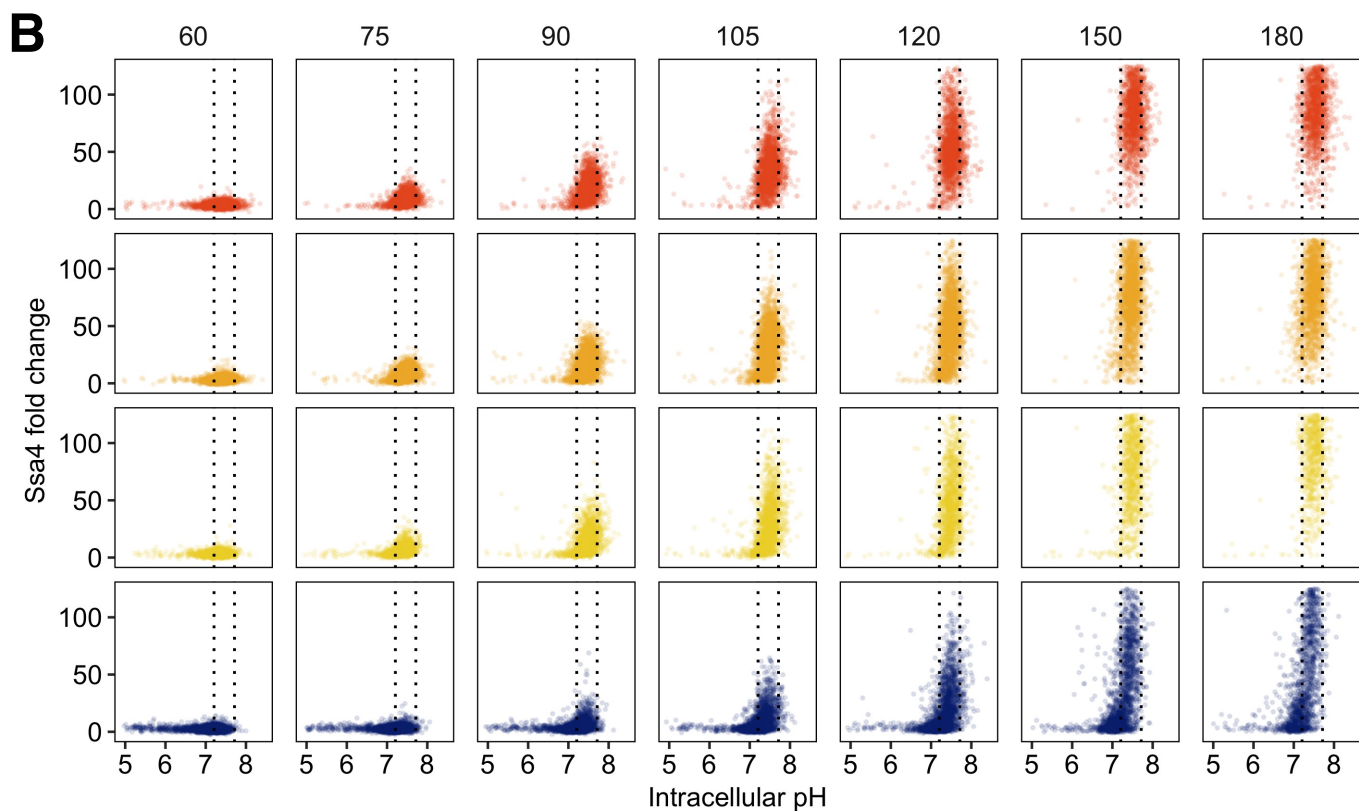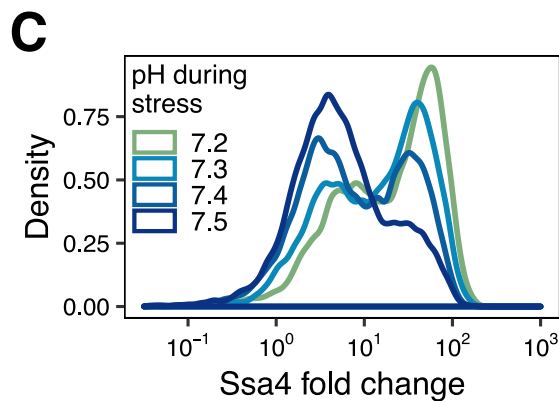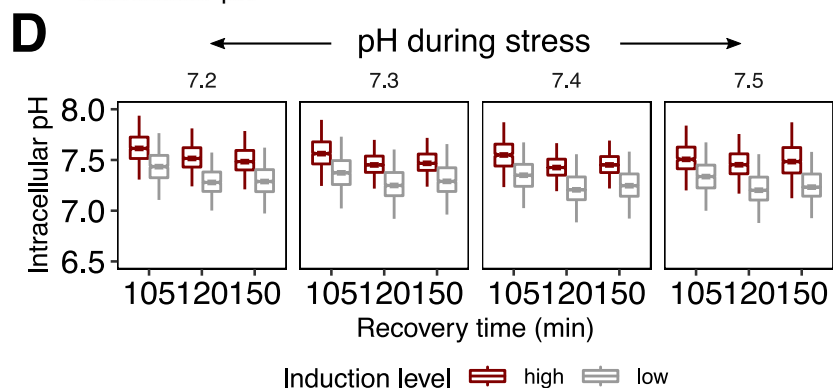

Supplement: supp [file elife_poa_e54880_Figure_5_figure_supplement_1.pdf › elife_poa_e54880_Figure_5_figure_supplement_1.pdf]

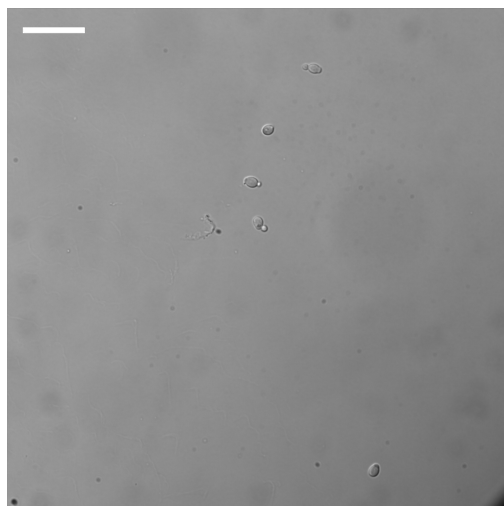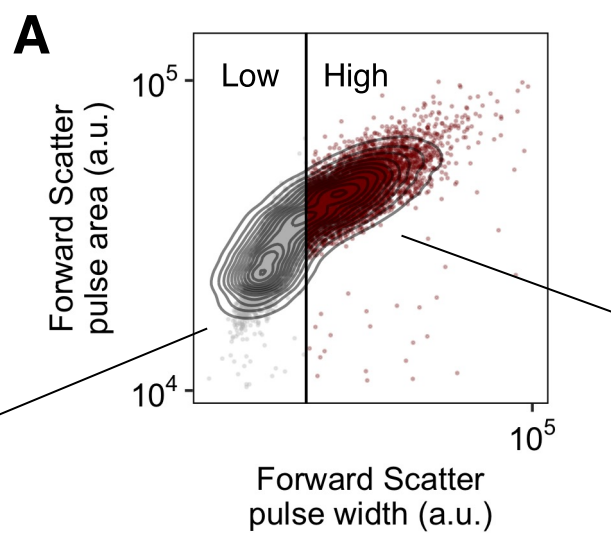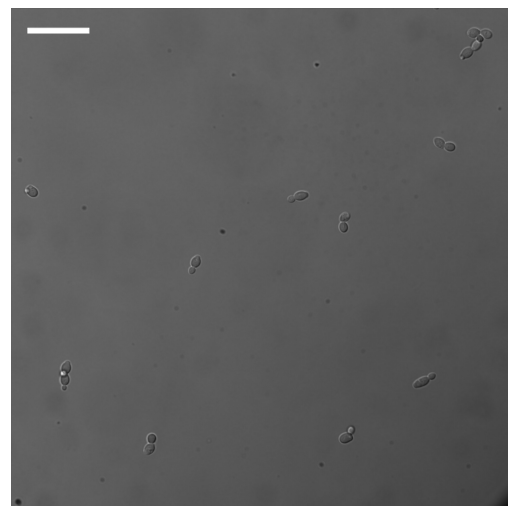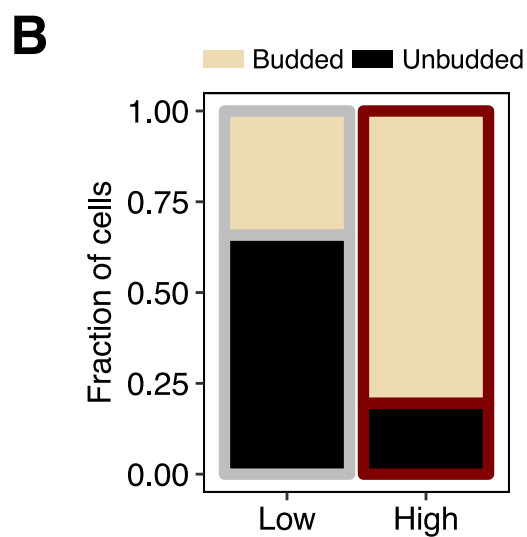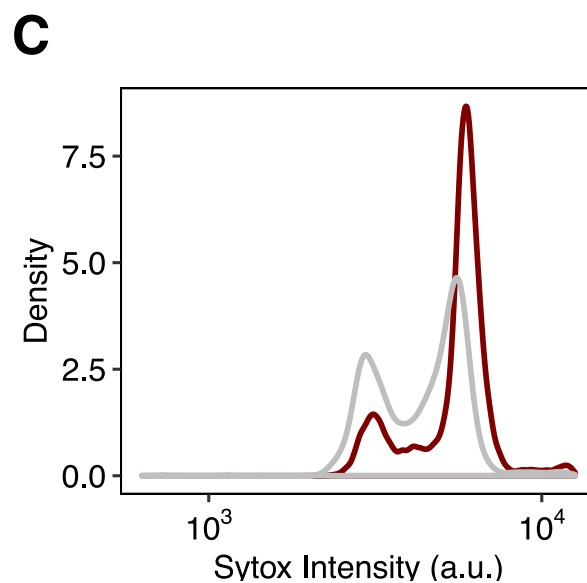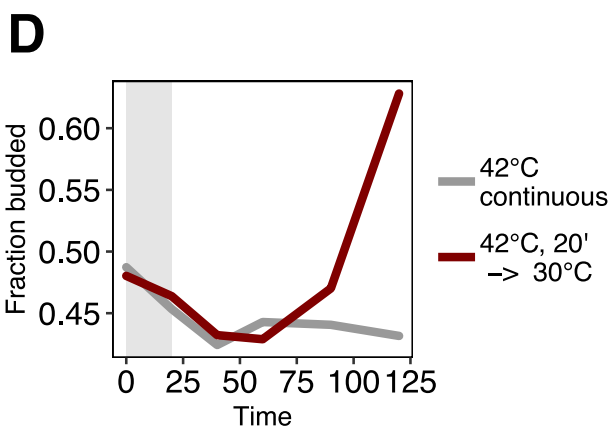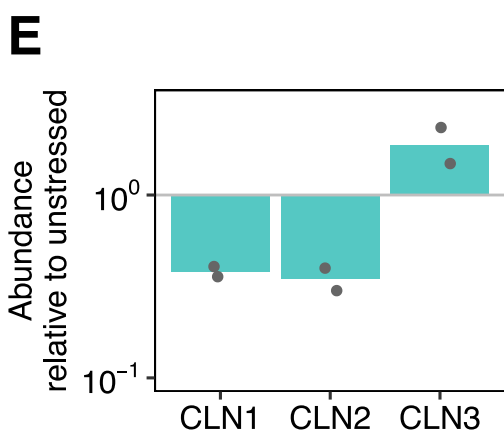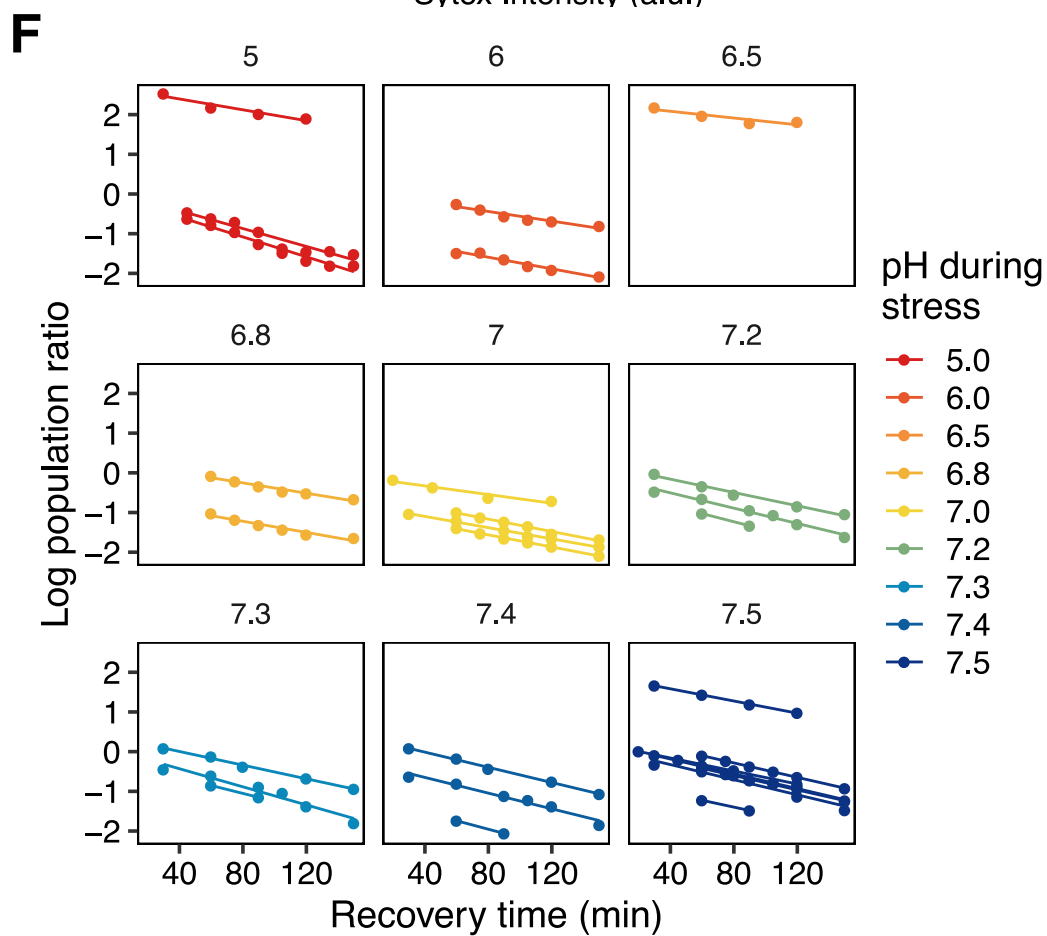

Supplement: supp [file elife_poa_e54880_Figure_6_figure_supplement_1.pdf › elife_poa_e54880_Figure_6_figure_supplement_1.pdf]
